# Supplementary material for: Architecture designed ZnO hollow microspheres with wide-range visible-light photoresponses
Source: Royal Society of Chemistry journal article supplement (doi:10.1039/c3tc31649a), 2013-01-01
Supplement: c3tc31649a.pdf [file c3tc31649a.pdf]

## Supporting Information

# Architecture Designed ZnO Hollow Microspheres with Wide-range Visible-light Photoresponses

Ziqi Sun<sup>§</sup>, Ting Liao<sup>¶</sup>, Jae-Geun Kim<sup>§</sup>, Kesong Liu<sup>†,\*</sup>, Lei Jiang<sup>†,‡</sup>, Jung Ho Kim<sup>§,\*</sup>, Shi Xue Dou<sup>§</sup>

<sup>§</sup>Institute for Superconducting and Electronic Materials, University of Wollongong, Innovation Campus, North Wollongong, NSW 2500, Australia

<sup>¶</sup>Australian Institute for Bioengineering and Nanotechnology, the University of Queensland, St Lucia, QLD 4072, Australia

<sup>†</sup>Key Laboratory of Bio-inspired Smart Interfacial Science and Technology of Ministry of Education, School of Chemistry and Environment, Beihang University, Beijing 100191, China

<sup>‡</sup>Beijing National Laboratory for Molecular Sciences (BNLMS), Key Laboratory of Organic Solids, Institute of Chemistry, Chinese Academy of Sciences, Beijing 100190, China

\* [jhk@uow.edu.au](mailto:jhk@uow.edu.au), [liuks@buaa.edu.cn](mailto:liuks@buaa.edu.cn)

## Experimental Procedures

### 1.1 Materials

The chemical reagents used for the synthesis of ZnO hollow microspheres with designed architectures are commercially available reagents. Zinc acetate dihydrate ( $\text{ZnAc}_2 \cdot 2\text{H}_2\text{O}$ , 99.5%), polyethylene oxide - polypropylene oxide - polyethylene oxide ( $\text{PEO}_{20}\text{-PPO}_{70}\text{-PEO}_{20}$ , Pluronic P123,  $M_n = 5,800$ ), ethylene glycol (EG, 99.8%), absolute ethanol (EtOH), and hexamethylenetetramine (HMTA, 99.0%) were purchased from Sigma-Aldrich. All the chemicals were used as received without further purification.

### 1.2 Synthesis of ZnO hollow microspheres

#### 1.2.1 Synthesis of ZnO hollow microspheres with solid smooth surface

In a typical experimental procedure, 0.2 g Pluronic P123 was added into 3 g EtOH, and together with 0.44 g  $\text{H}_2\text{O}$  and 0.2 g  $\text{ZnAc}_2 \cdot 2\text{H}_2\text{O}$ , or 0.41 g  $\text{H}_2\text{O}$  and 0.4 g  $\text{ZnAc}_2 \cdot 2\text{H}_2\text{O}$ , then 0.25 g or 0.09 g HMTA, respectively, was added under stirring, and then 46 ml EG was put into the ethanol solution. After stirring for 10 min, a transparent solution was obtained. The

transparent precursor solution was divided into two parts, transferred into two 45 ml autoclaves, and heated at 110 °C for 15 h. The products of the solvothermal reaction were washed with distilled water and ethanol 3 times, and the light yellow powders were collected after washing/centrifugation and drying at 80 °C for 24 h. Some powders were redispersed in ethanol by ultrasonication for further characterization.

### **1.2.2 Synthesis of ZnO hollow microspheres with nanowire network building units**

0.2 g Pluronic P123 was added into 3 g EtOH with 0.44 g water and stirred for 15 min to form a clear solution, and then 0.2 g  $\text{ZnAc}_2 \cdot 2\text{H}_2\text{O}$  and 0.09 g HMTA were added into the surfactant solution. After stirring for around 15 min, a clear solution was obtained. Then, 46 ml EG was put into the ethanol solution. After stirring for 30 min, a transparent solution was obtained. The obtained EtOH + EG precursor solution was statically aged for 3 days. After aging, the transparent precursor solution was divided into two parts, transferred into two 45 ml autoclaves, and heated at 110 °C for 15 h. The products of the solvothermal reaction were washed with distilled water and ethanol 3 times, and the light yellow powders were collected after washing/centrifugation and drying at 80 °C for 24 h. Some powders were redispersed in water and ethanol by ultrasonication for further characterization.

### **1.2.3 Synthesis of ZnO hollow microspheres with nanosheet stack building units**

0.2 g Pluronic P123 was added into 3 g EtOH with 0.45 g  $\text{H}_2\text{O}$  to form a clear solution with stirring for 15 min, and then 0.1 g  $\text{ZnAc}_2 \cdot 2\text{H}_2\text{O}$  and 0.045 g HMTA were added into the ethanol solution. After stirring for around 15 min, a clear solution was obtained. Then, 46 ml EG was put into the ethanol solution. After stirring for 30 min, a transparent solution was obtained. The obtained EtOH + EG precursor solution was statically aged for 3 days or 7 days. After aging, the transparent precursor solution was divided into two parts, transferred into two 45 ml autoclaves, and heated at 110 °C for 15 h. The products of the solvothermal reaction were washed with distilled water and ethanol 3 times, and the light yellow powders were

collected after washing/centrifugation and drying at 80 °C for 24 h. Some powders were redispersed in water and ethanol by ultrasonication for further characterization.

#### **1.2.4 Two-Step Synthesis of ZnO hollow microspheres with mesoporous nanoball constituent units**

0.2 g Pluronic P123 was added into 3 g EtOH with the desired amount of water (0.44 g H<sub>2</sub>O for 0.2 g ZnAc<sub>2</sub>·2H<sub>2</sub>O, or 0.41 g H<sub>2</sub>O for 0.4 g ZnAc<sub>2</sub>·2H<sub>2</sub>O) and stirred for 15 min to form a clear solution, and then 0.2 g ZnAc<sub>2</sub>·2H<sub>2</sub>O and 0.25 g HMTA, or 0.4 g ZnAc<sub>2</sub>·2H<sub>2</sub>O and 0.09 g HMTA were added into the surfactant solution. After stirring for around 15 min, a clear solution was obtained. Then, 46 ml EG was put into the ethanol solution. After stirring for 30 min, a transparent solution was obtained. The obtained EtOH + EG precursor solution was statically aged for 7 days. After aging, the transparent precursor solution was divided into two parts, transferred into two 45 ml autoclaves, and heated at 110 °C for 15 h. The products of the solvothermal reaction were washed with distilled water and ethanol 3 times, and the light yellow powders were collected after washing/centrifugation and drying at 80 °C for 24 h. Some powders were redispersed in water and ethanol by ultrasonication for further characterization.

### **1.3 Characterizations**

The composition and phase of the as-prepared products were measured by a powder X-ray diffractometer (XRD, MMA, GBC Scientific Equipment LLC, Hampshire, IL, USA) with Cu K<sub>α</sub> radiation. The morphology of the samples was observed with a scanning electron microscope (SEM, JSM-7500FA, JEOL, Tokyo, Japan). High resolution transmission electron microscope observation was carried out using a JEM-2011F (HRTEM, JEOL, Tokyo, Japan) operated at 200 kV. Surface area was measured by a surface area analyzer (NOVA1000, Quantachrome Co., FL, USA) at 77 K. Before measurement, the sample was heated at 120 °C for 5 h. The specific surface area was calculated based on the slop and intercept of the linear

adsorption isotherm in the  $p/p_0$  range over 0.05 to 0.35, according to the BET theory. For each sample, three batches of powders were measured for average. Ultraviolet-Visible (UV-Vis) absorption spectra were collected on the thin films of ZnO hollow microspheres, which prepared by spin coating 10 wt.% aqueous ZnO hollow microsphere suspensions on transparent glasses and followed with heating at 400 °C for 1 h to remove the influence of residual surfactant molecules, on a UV-Visible light absorption spectroscope in the wavelength range of 195-800 nm (Shimadzu UV-3600, Japan).

For the photoresponse testing, the ZnO hollow microsphere thin films were prepared by spin coating 10 Wt% aqueous suspensions at 2000 rpm for 5 times on a FTO glass and then heated at 400 °C for 2 h. Thin films with an active area of 1 cm<sup>2</sup> were assembled with a FTO counter electrode. Photocurrent of the thin films was examined by a Keithley 2400 source meter under alternative visible-light ( $\lambda > 420$  nm, 65 mW·cm<sup>-2</sup>) and dark illumination at 1 V bias and 10 s or 30 s intervals. In some cases, the alternating simulated solar light (100 mW·cm<sup>-2</sup>) and visible light illumination as well as the alternating pure UV irradiation (325 nm, 15 mW·cm<sup>-2</sup>) and dark with a 10 s interval were also employed for photocurrent measurements. The quantum emission efficiency of the nanostructures was tested under monochromatic irradiation between 300-800 nm on the samples that were assembled with a Pt counterelectrode and filled with a commercial electrolyte purchased from Solaronix (Iodolyte AN-50) to promote the electron transport between the electrodes. The utilization of electrolyte may slightly influence the visible light responses around 550 nm, but it seems essential to obtain distinguishable signals.

**Table S1**

**Table S1:** Compositions of precursor solutions and aging time and the ZnO hollow microspheres after synthesis.

| Sample numbers | Composition of reaction solution                                                      | Aging time | Morphology of hollow spheres                                                         | Shape of constituent units | Average size |
|----------------|---------------------------------------------------------------------------------------|------------|--------------------------------------------------------------------------------------|----------------------------|--------------|
| ZSH-1          | 2P123:4.1H <sub>2</sub> O:30EtOH:4ZnAc <sub>2</sub> ·2H <sub>2</sub> O:2.5HMTA:500EG  | 0          | 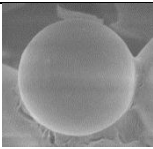   | Solid shell                | 2.27±0.46 μm |
| ZSH-1'         | 2P123:4.4H <sub>2</sub> O:30EtOH:2ZnAc <sub>2</sub> ·2H <sub>2</sub> O:0.9HMTA:500EG  | 0          |                                                                                      |                            | 3.57±0.49 μm |
| ZSH-2          | 2P123:4.4H <sub>2</sub> O:30EtOH:2ZnAc <sub>2</sub> ·2H <sub>2</sub> O:0.9HMTA:500EG  | 3 days     |    | 1D nanowire network        | 2.00±0.19 μm |
| ZSH-3          | 2P123:4.5H <sub>2</sub> O:30EtOH:1ZnAc <sub>2</sub> ·2H <sub>2</sub> O:0.45HMTA:500EG | 3 days     |    | 2D nanosheet stack         | 1.50±0.18 μm |
| ZSH-3'         | 2P123:4.5H <sub>2</sub> O:30EtOH:1ZnAc <sub>2</sub> ·2H <sub>2</sub> O:0.45HMTA:500EG | 7 days     |   | 2D nanosheet               | N/A          |
| ZSH-4          | 2P123:4.4H <sub>2</sub> O:30EtOH:2ZnAc <sub>2</sub> ·2H <sub>2</sub> O:0.9HMTA:500EG  | 7 days     |  | 3D nanoball block          | 1.03±0.16 μm |
| ZSH-4'         | 2P123:4.1H <sub>2</sub> O:30EtOH:4ZnAc <sub>2</sub> ·2H <sub>2</sub> O:2.5HMTA:500EG  | 7 days     |  | 3D nanoball block          | 1.78±0.25 μm |

**Figure S1**

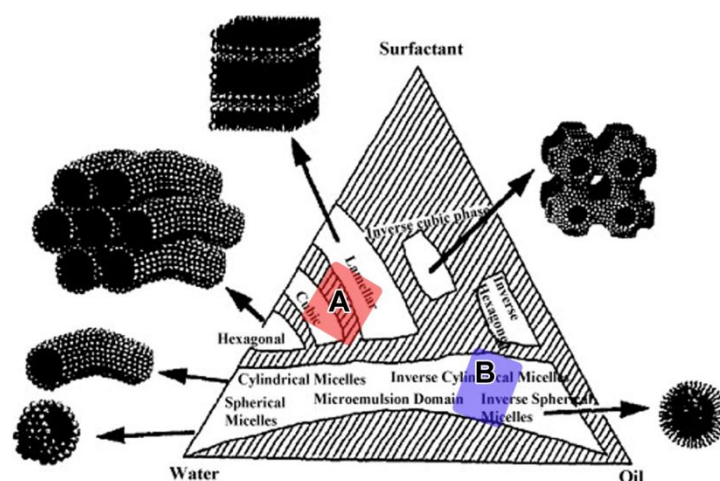

**Figure S1:** Schematic phase diagram of surfactant-water-oil systems showing a variety of self-assembled structures. The area “A” in (a) indicates the desired starting proportion of surfactant-water-oil to form expected nanostructured building constituents, and area “B” indicates the desired proportion of surfactant-water-oil during hydrothermal and with the addition of EG to form shelled spherical structures. (Adapted from J. Liu *et al*, *Adv. Colloid. Inter. Sci.* 1996, **69**, 131.)

**Figure S2**

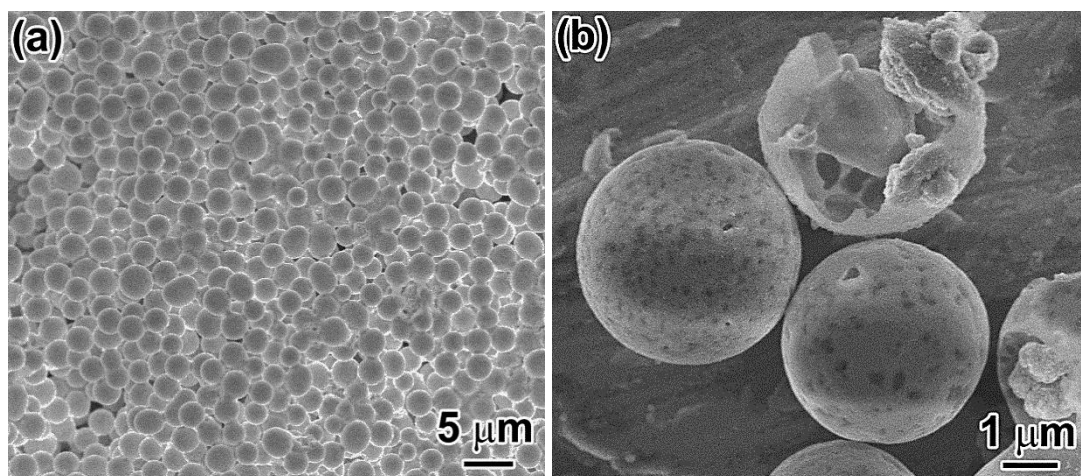

**Figure S2:** (a) Low-magnification and (b) high-magnification images of ZnO hollow microspheres synthesized from the 2P123:4.4H<sub>2</sub>O:30EtOH:2ZnAc<sub>2</sub>·2H<sub>2</sub>O:0.9HMTA:500EG solution without aging (ZHS-1').

**Figure S3**

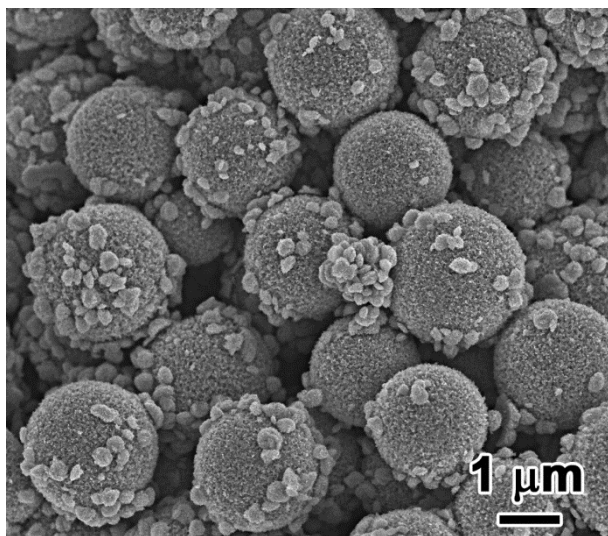

**Figure S3:** Low magnification image of ZnO hollow microspheres synthesized from the 2P123:4.4H<sub>2</sub>O:30EtOH:2ZnAc<sub>2</sub>·2H<sub>2</sub>O:0.9HMTA:500EG solution and aged for 3 days (ZHS-2).

**Figure S4**

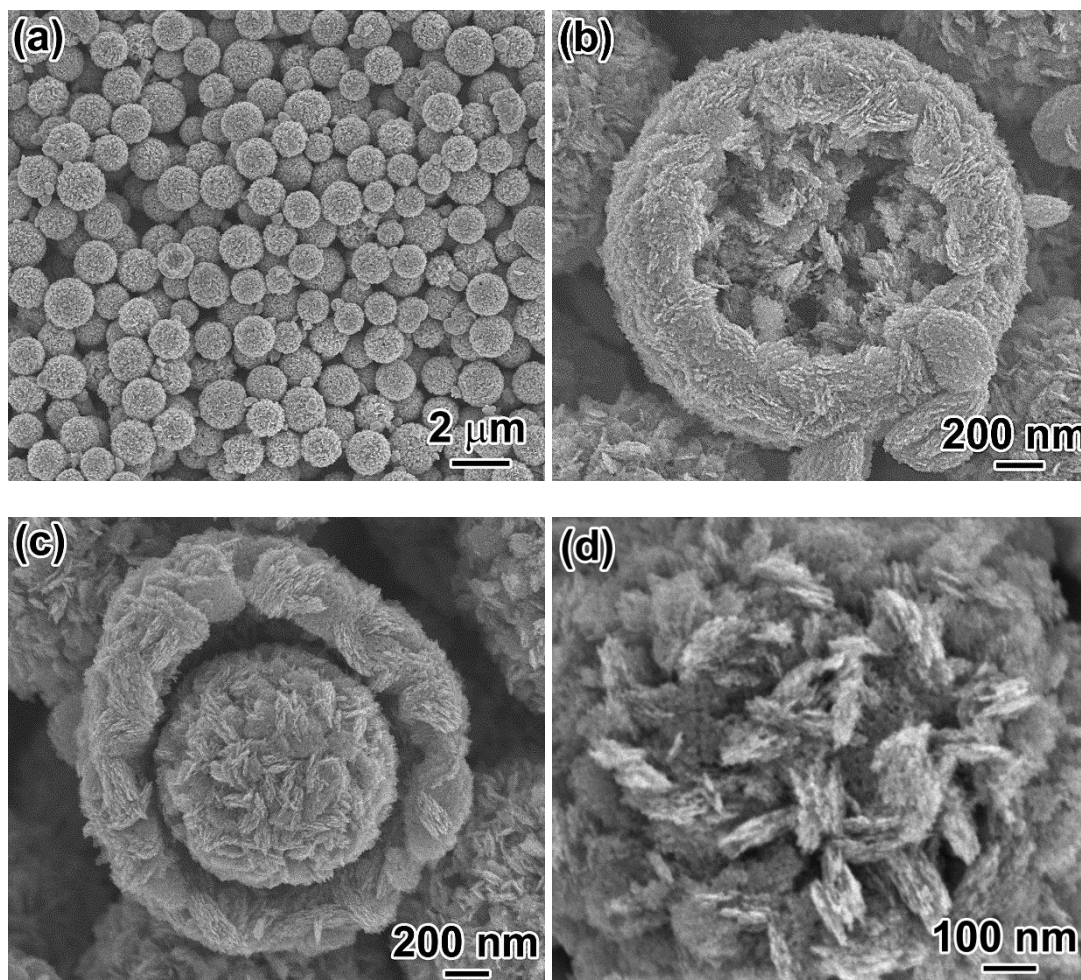

**Figure S4:** (a) Low magnification image of hollow microspheres synthesized from the 2P123:4.5H<sub>2</sub>O:30EtOH:1ZnAc<sub>2</sub>·2H<sub>2</sub>O:0.45HMTA:500EG solution and aged for 3 days (ZHS-3); (b) high magnification image of a half microsphere; (c) high magnification image of a double layered hollow microsphere; and (d) high magnification image of the constituent nanosheet stacks.

**Figure S5**

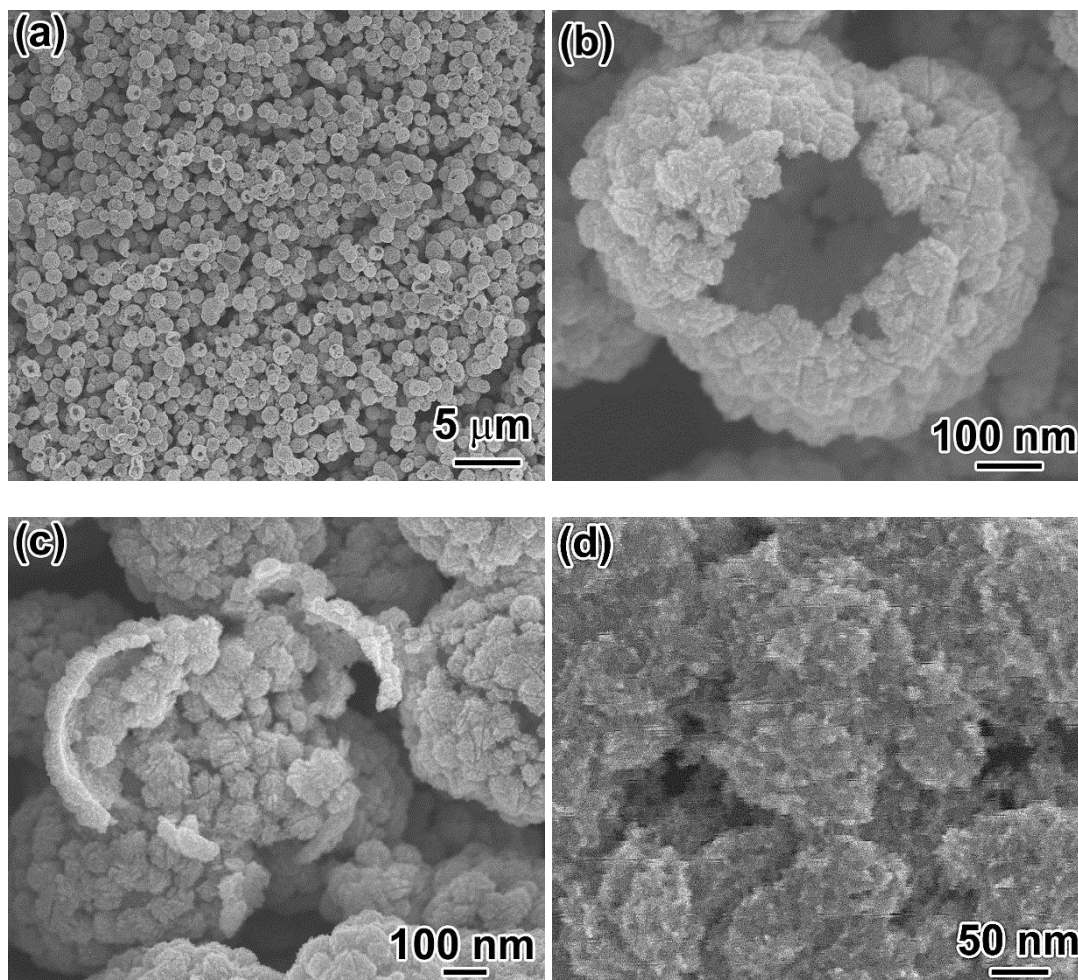

**Figure S5:** (a) Low magnification and (b) high magnification SEM images of ZnO microspheres composed of nanoball blocks that were synthesized from the 2P123:4.4H<sub>2</sub>O:30EtOH:2ZnAc<sub>2</sub>·2H<sub>2</sub>O:0.9HMTA:500EG solution and aged for 7 days (ZHS-4); (c) high magnification SEM image of one broken ZHS-4 hollow microspheres with a well-defined shell structure; and (d) high magnification image of the building blocks of ZHS-4.

**Figure S6**

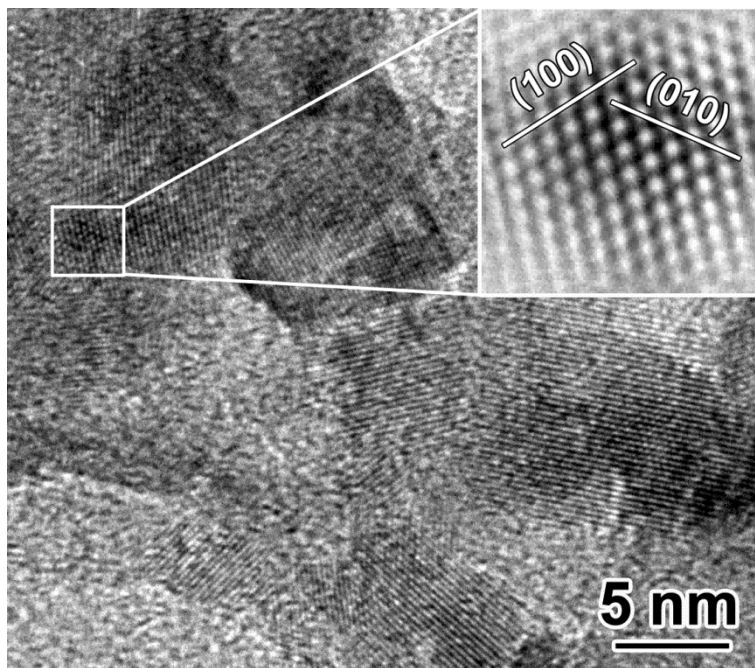

**Figure S6:** HRTEM image of the nanowires in the shells of the hollow microspheres of ZSH-2.

**Figure S7**

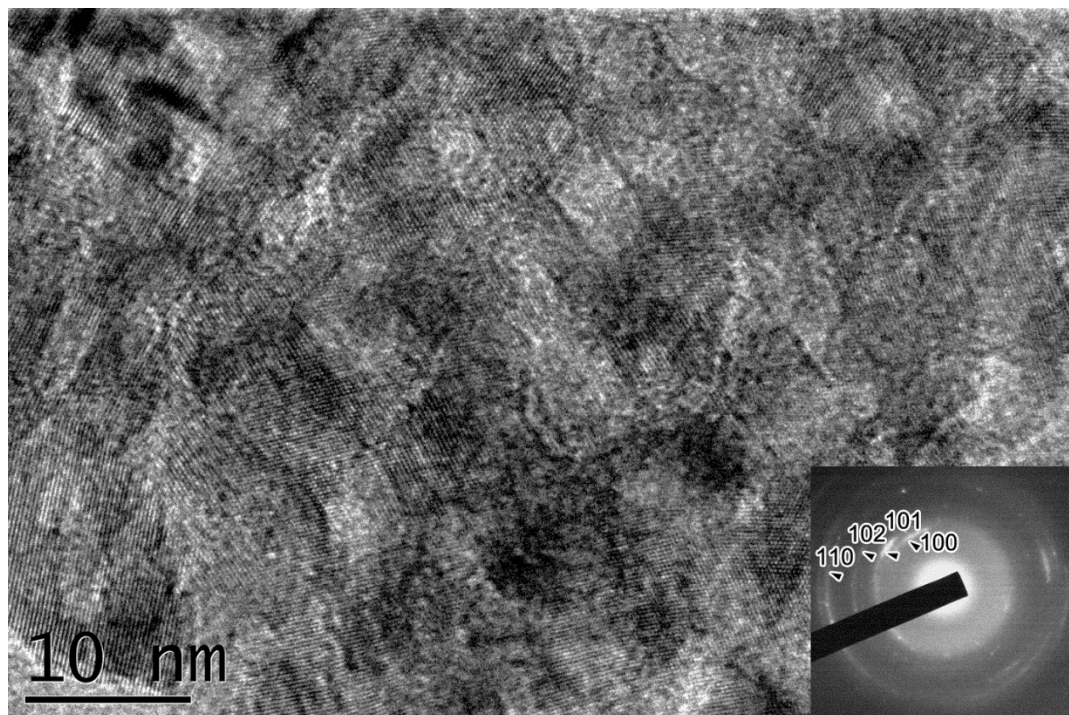

**Figure S7:** HRTEM image of the nanosheets in the shells of the hollow microspheres of ZSH-3. The inset is the corresponding selected area electron diffraction (SAED) pattern.

**Figure S8**

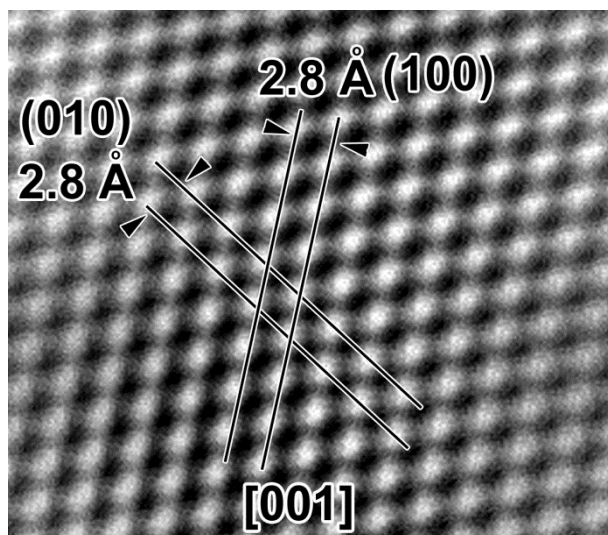

**Figure S8:** HRTEM image of the ZnO nanocrystallites in the constituent nanosheet stacks of ZSH-3.

**Figure S9**

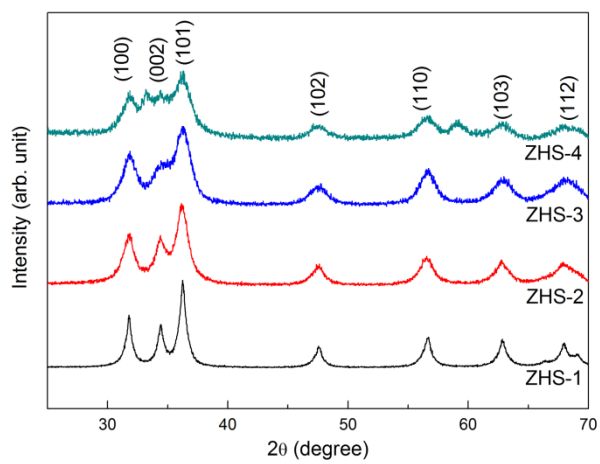

**Figure S9:** XRD patterns of ZnO hollow microspheres.

**Figure S10**

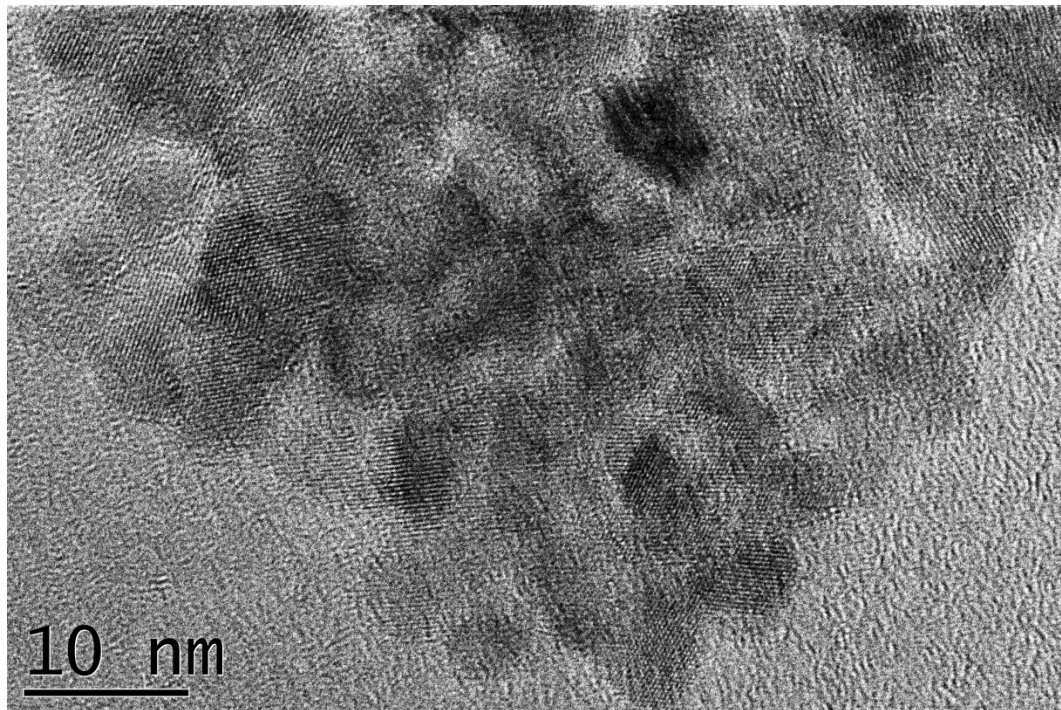

**Figure S10:** HRTEM image of the nanowires in the shells of the hollow microspheres of ZSH-4.

**Figure S11**

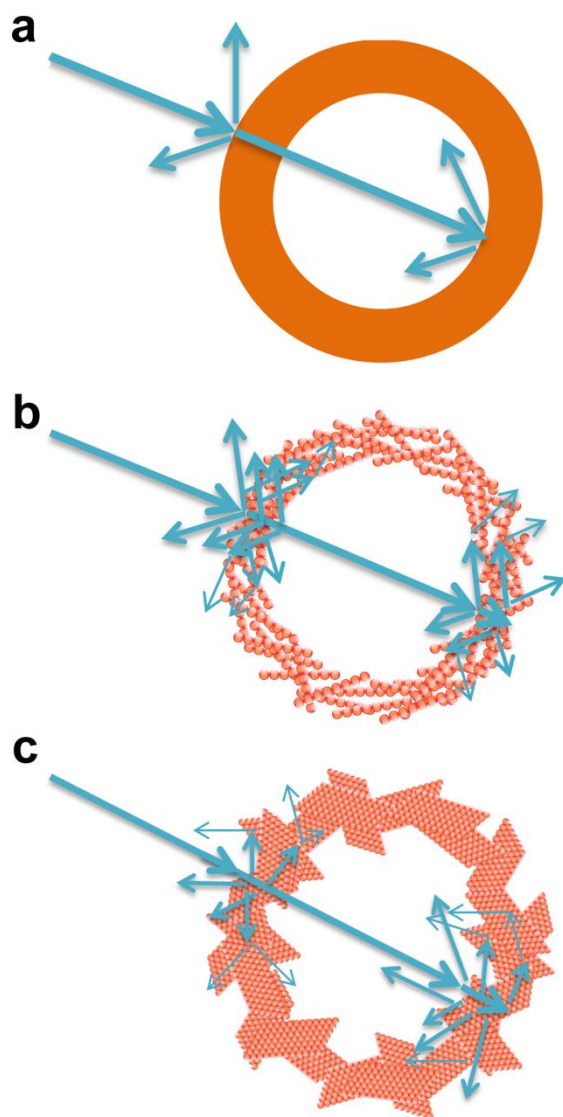

**Figure S11:** Schematic drawing that shows the multiple light reflections within ZnO hollow spheres with: (a) a solid shell, (b) a nanowire shell, and (c) a nanosheet shell.

**Figure S12**

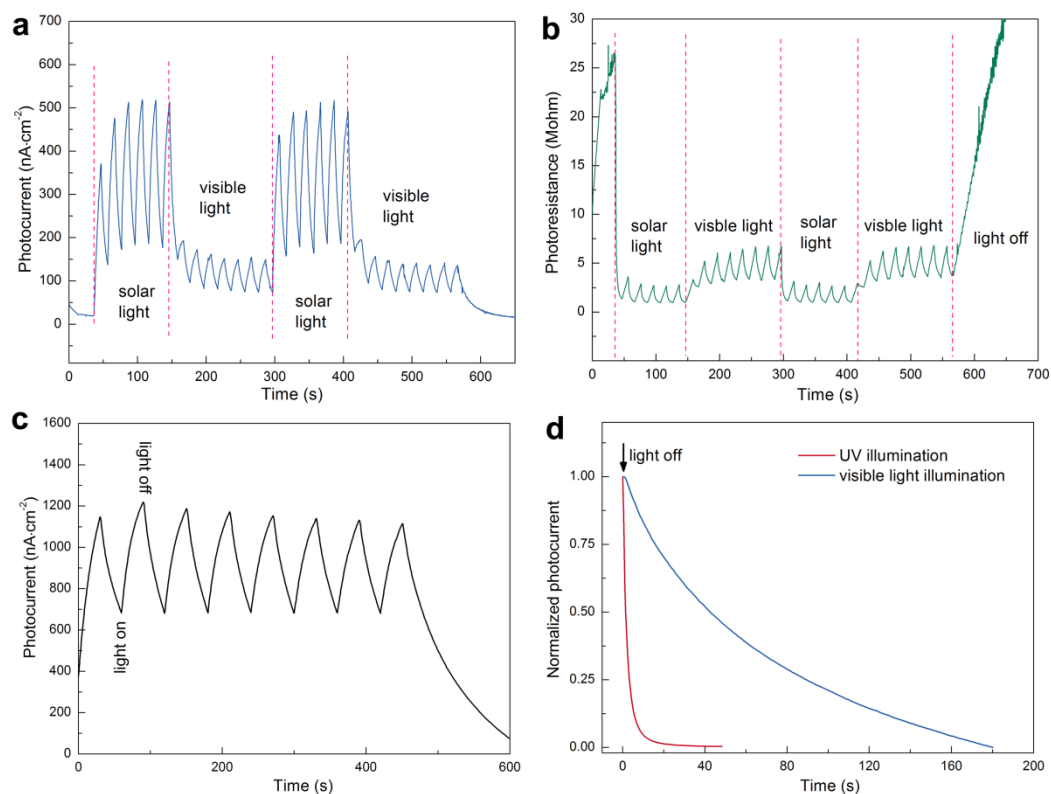

**Figure S12:** (a) Photoresponse behavior of ZHS-2 under alternating solar light and visible light illumination; (b) variation of resistance of photoelectrode of ZHS-2 under alternating solar light and visible light illumination; (c) Visible-light photoresponses of ZnO hollow microsphere electrodes in the morphology of 3D mesoporous nanoballs (ZHS-4), under alternative visible-light and dark illumination at 1 V bias and 30 s interval; and (d) photocurrent decay behavior of ZHS-4 after UV-irradiation and visible light illumination, respectively.
